# Supplementary material for: A Metabolomics-Guided Exploration of the Phytochemical Constituents of Vernonia fastigiata with the Aid of Pressurized Hot Water Extraction and Liquid Chromatography-Mass Spectrometry
Source: PubMed Central journal article supplement (PMC6152066; doi:10.3390/molecules22081200), 2017-07-27
Supplement: molecules-22-01200-s001.pdf [file molecules-22-01200-s001.pdf]

## Supplementary data

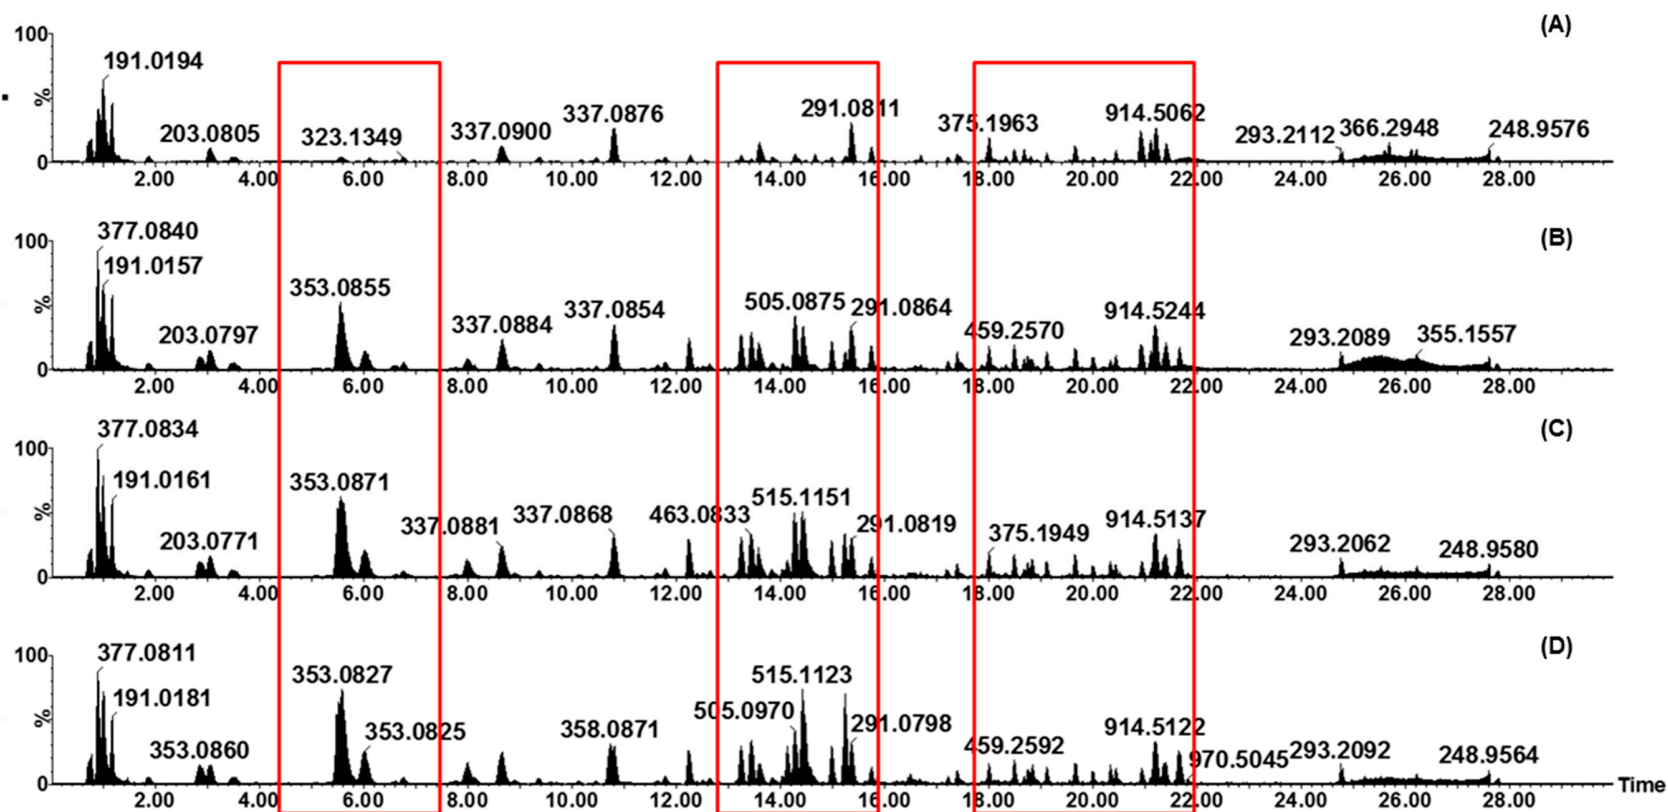

**Figure S1.** Ultra-high performance liquid chromatography (UHPLC) mass chromatograms, obtained using electrospray ionization (ESI) in negative mode, representing pressurized hot water extraction (PHWE) of *Vernonia fastigiata* metabolites at: (A) 50 °C, (B) 100 °C, (C) 150 °C and (D) 200 °C.

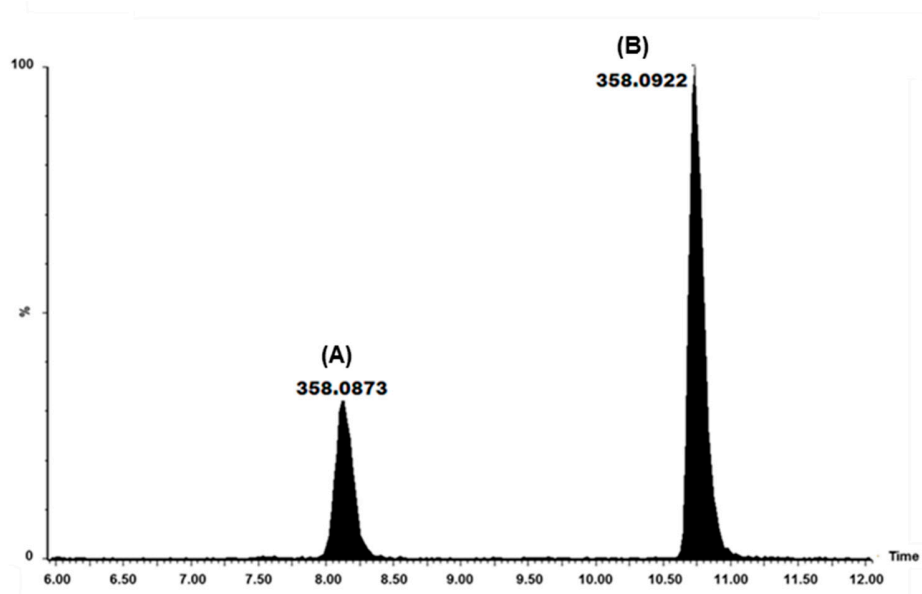

**Figure S2.** Extracted ion chromatograms of: (A) *cis*-clovamide and (B) *trans*-clovamide.

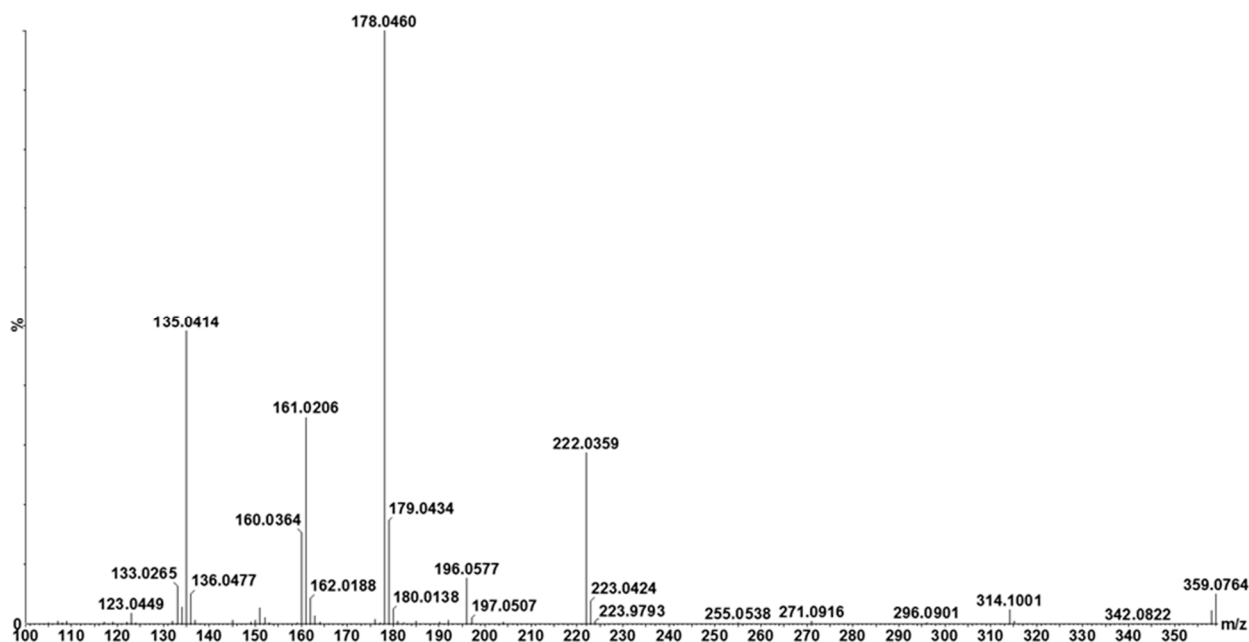

**Figure S3.** Mass spectra showing the fragmentation pattern for both *cis*- and *trans*-clovamide.

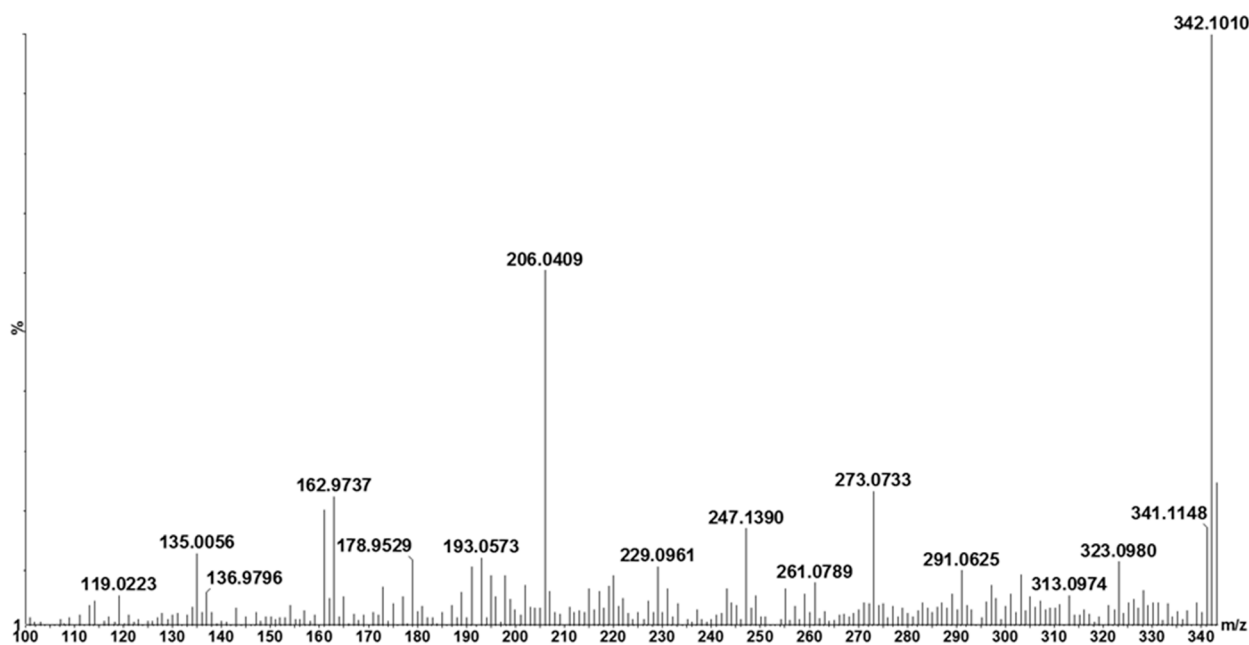

**Figure S4.** Mass spectra showing the fragmentation pattern for deoxyclovamide.
